# Supplementary material
Source: Springer Nature journal article supplement (https://www.springermedizin.de/resource/supplementary/13022_2008_17_MOESM2_ESM.pdf/9641316)

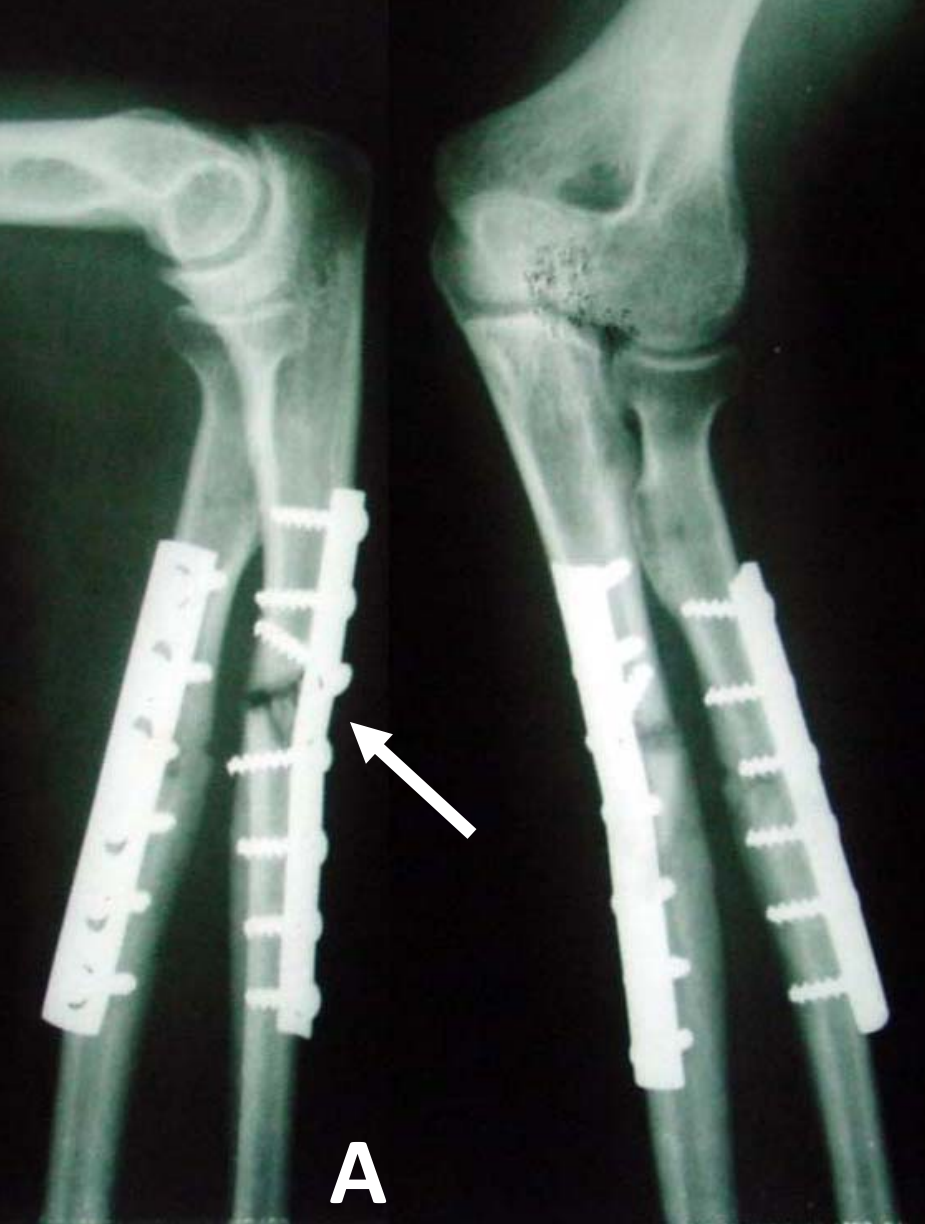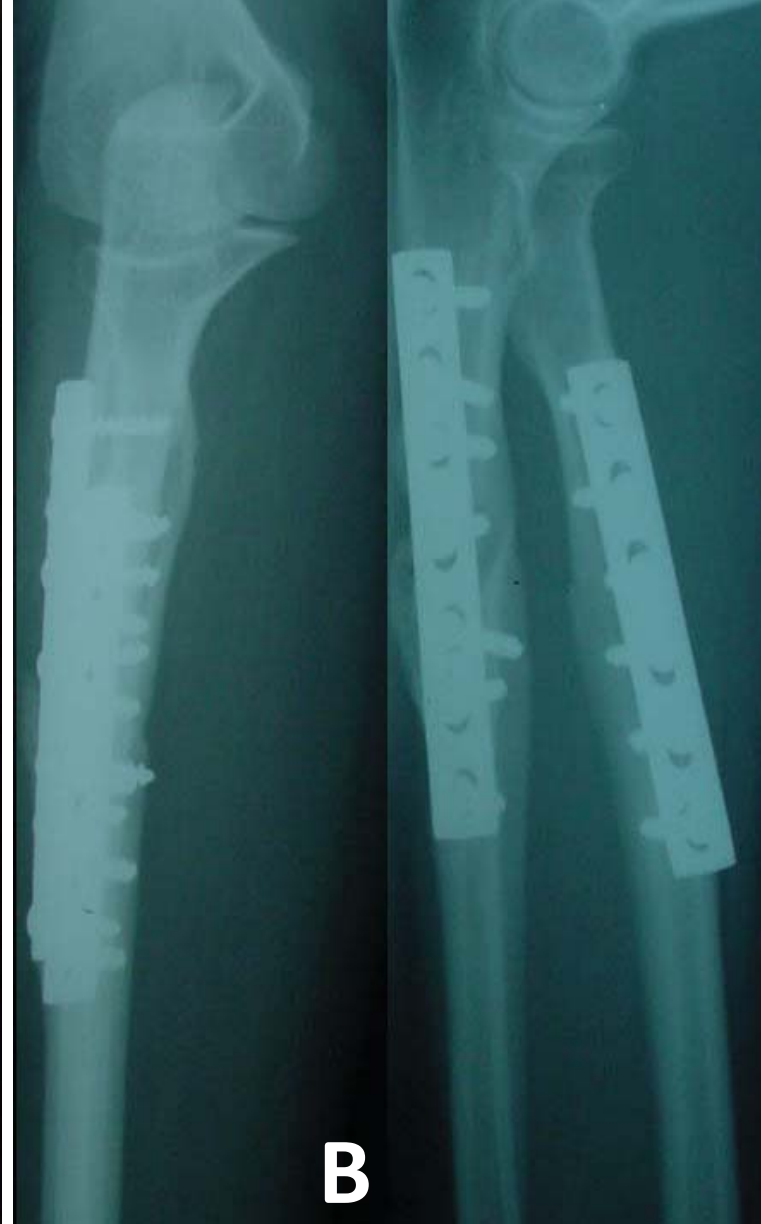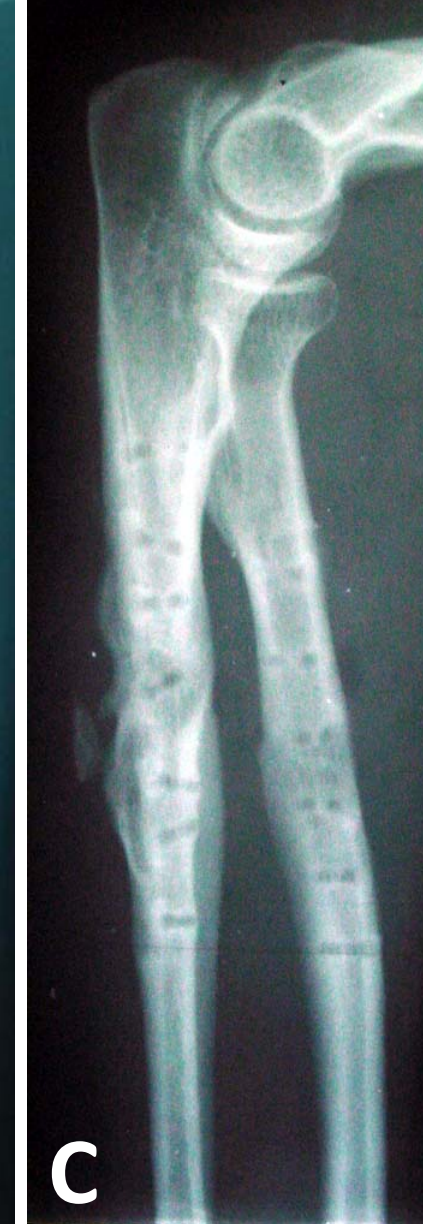

Supplement: MOESM2 [file 9641316]
